# Supplementary material for: Does parenting help to explain socioeconomic inequalities in children's body mass index trajectories? Longitudinal analysis using the Growing Up in Scotland study
Source: PubMed Central journal article supplement (PMC5013155; doi:10.1136/jech-2015-206616), 2016-04-07
Supplement: jech-2015-206616supp_S2.pdf [file jech-2015-206616supp_S2.pdf]

## Supplementary file S2

### Measurement model of latent constructs of unhealthy child diet and parenting

---

|                                             | <b>β (SE)</b> | <b>Loading</b> |
|---------------------------------------------|---------------|----------------|
| <b>Unhealthy child diet</b>                 |               |                |
| Sweets/chocolate (58 months)                | 0.48 (0.02)   | 0.48           |
| Crisps (58 months)                          | 0.47 (0.03)   | 0.47           |
| Vegetables (58 months)                      | -0.42 (0.02)  | -0.42          |
| Skip breakfast (58 months)                  | 0.55 (0.06)   | 0.55           |
| <b>Informal meal setting</b>                |               |                |
| Main meal in non-dining area (22 months)    | 0.75 (0.02)   | 0.78           |
| Main meal in non-dining area (58 months)    | 0.92 (0.02)   | 0.92           |
| Eat main meal watching TV (58 months)       | 0.63 (0.02)   | 0.62           |
| <b>Positive mealtime social interaction</b> |               |                |
| Mealtimes are enjoyable (58 months)         | 0.54 (0.03)   | 0.54           |
| Mealtimes give us time to talk (58 months)  | 0.81 (0.04)   | 0.81           |
| <b>Bedroom TV</b>                           |               |                |
| Bedroom TV (46 months)                      | 0.92 (0.02)   | 0.92           |
| Bedroom TV (58 months)                      | 0.99 (0.02)   | 0.99           |

---

### Correlations among latent constructs

|                                             | <b>Unhealthy child diet</b> | <b>Informal meal setting</b> | <b>Positive mealtime social interaction</b> |
|---------------------------------------------|-----------------------------|------------------------------|---------------------------------------------|
| <b>Unhealthy child diet</b>                 |                             |                              |                                             |
| <b>Informal meal setting</b>                | 0.52                        |                              |                                             |
| <b>Positive mealtime social interaction</b> | -0.35                       | -0.39                        |                                             |
| <b>Bedroom TV</b>                           | 0.65                        | 0.50                         | -0.22                                       |

Notes: Model fit Comparative Fit Index =0.99, Root Mean Square Error of Approximation =0.03. Standardised coefficients ( $\beta$ ) and standard errors (SE) are shown, all  $p < 0.001$ .
