# Supplementary material for: Does parenting help to explain socioeconomic inequalities in children's body mass index trajectories? Longitudinal analysis using the Growing Up in Scotland study
Source: PubMed Central journal article supplement (PMC5013155; doi:10.1136/jech-2015-206616), 2016-04-07
Supplement: jech-2015-206616supp_S3.pdf [file jech-2015-206616supp_S3.pdf]

**Supplementary file S3****Sensitivity analysis - effects using mediator factor scores****Direct and indirect effects of lower maternal education on child BMI slope**

|                                                           | Estimate (SE) | <i>p</i> |
|-----------------------------------------------------------|---------------|----------|
| <b>Total</b>                                              | 0.17 (0.05)   | 0.001    |
| <b>Total indirect</b>                                     | 0.10 (0.03)   | 0.002    |
| <b>Specific indirect effects</b>                          |               |          |
| Via unhealthy diet                                        | 0.01 (0.01)   | 0.078    |
| Via informal setting                                      | 0.02 (0.04)   | 0.596    |
| Via less positive mealtime interaction                    | -0.03 (0.01)  | 0.023    |
| Via bedroom TV                                            | -0.03 (0.05)  | 0.581    |
| Via informal setting and unhealthy diet                   | 0.02 (0.01)   | 0.014    |
| Via less positive mealtime interaction and unhealthy diet | 0.01 (0.00)   | 0.009    |
| Via bedroom TV and unhealthy diet                         | 0.09 (0.04)   | 0.010    |
| <b>Direct effect</b>                                      | 0.07 (0.06)   | 0.232    |

Model as for Figure 2. Unlike Figure 2, this table shows unstandardised estimates.
